# Supplementary material for: Associations of circulation levels of cytokines with birthweight, preterm birth, spontaneous miscarriages, and stillbirth: A Mendelian randomization analysis
Source: Front Genet. 2023 Feb 20;14:1113804. doi: 10.3389/fgene.2023.1113804 (PMC9986262; doi:10.3389/fgene.2023.1113804)
Supplement: Supplementary file 1 [file Table1.XLSX]

## Sheet: Tab S1
Supplementary Table S1: F-Statistics for SNPs included in the analyses
Cytokines	Abbreviation	Median F-Statistic	Range of F-Statistics
Interleukin-1-beta	IL-1b	15.3467	11.98-21.35
Interleukin-1 receptor antagonist	IL1ra	21.2435	19.49-24.05
Interleukin-2	IL-2	21.3564	19.70-28.23
Interleukin-2 receptor, alpha subunit	IL2ra	20.8235	19.51-167.61
Interleukin-4	IL-4	21.7778	19.71-26.63
Interleukin-5	IL-5	20.8368	19.40-37.93
Interleukin-6	IL-6	21.2909	19.56-29.31
Interleukin-7	IL-7	22.1437	19.37-169.84
Interleukin-8 (CXCL8)	IL-8	20.4352	19.57-25.85
Interleukin-9	IL-9	20.5019	19.53-26.46
Interleukin-10	IL-10	22.4397	19.62-298.98
Interleukin-12p70	IL-12p70	21.0237	19.64-564.29
Interleukin-13	IL-13	20.9989	19.60-292.85
Interleukin-16	IL-16	24.4293	20.16-131.98
Interleukin-17	IL-17	21.8198	19.51-38.97
Interleukin-18	IL-18	24.0004	19.57-96.17
Beta nerve growth factor	bNGF	20.7654	19.58-36.50
Cutaneous T-cell attracting (CCL27)	CTACK	21.4322	19.50-142.66
Eotaxin (CCL11)	Eotaxin	21.5347	18.57-203.26
Basic fibroblast growth factor	FGFBasic	20.2042	18.74-24.43
Granulocyte colony-stimulating factor	GCSF	21.4348	20.07-25.15
Growth regulated oncogene-α (CXCL1)	GROa	20.8605	19.55-250.49
Hepatocyte growth factor	HGF	20.7426	19.70-57.25
Interferon-gamma	IFNg	22.6537	19.49-27.68
Interferon gamma-induced protein 10 (CXCL10)	IP10	21.4152	19.88-32.04
Monocyte chemotactic protein-1 (CCL2)	MCP1	21.7202	19.06-198.72
Monocyte specific chemokine 3 (CCL7)	MCP3	20.3208	19.51-25.68
Macrophage colony-stimulating factor	MCSF	21.2546	17.64-31.64
Macrophage migration inhibitory factor (glycosylation-inhibiting factor)	MIF	20.1398	18.89-28.11
Monokine induced by interferon-gamma (CXCL9)	MIG	22.1269	17.24-42.38
Macrophage inflammatory protein-1α (CCL3)	MIP1a	20.9823	19.28-22.81
Macrophage inflammatory protein-1β (CCL4)	MIP1b	21.9943	19.68-789.15
Platelet derived growth factor BB	PDGFbb	23.6652	20.21-245.35
Regulated on Activation, Normal T Cell Expressed and Secreted (CCL5)	RANTES	21.3307	19.78-29.99
Stem cell factor	SCF	20.7982	19.76-48.67
Stem cell growth factor beta	SCGFb	21.4909	19.49-99.38
Stromal cell-derived factor-1 alpha (CXCL12)	SDF1a	15.0883	11.16-29.21
Tumor necrosis factor-alpha	TNFa	20.2349	19.77-24.95
Tumor necrosis factor-beta	TNFb	21.3148	19.62-79.96
TNF-related apoptosis inducing ligand	TRAIL	21.4878	19.48-370.00
Vascular endothelial growth factor	VEGF	22.0708	19.66-784.00

## Sheet: Tab S2
Supplementary Table S2: Genetic instruments included in the analyses
Cytokines	SNP	Effect Allele	F-Statistic*
IL-1b	rs143319329	T	15.3467
	rs1942793	T	14.7013
	rs2255932	G	21.352
	rs6105735	C	11.9755
	rs61335305	A	16.7828
	rs62015704	G	14.6178
	rs9898641	C	20.0325
IL1ra	rs1054402	C	23.5764
	rs11627423	C	22.476
	rs12051139	C	19.696
	rs12121840	T	22.2268
	rs2809154	T	21.1885
	rs4441609	C	20.0565
	rs56134659	G	22.2131
	rs61335305	A	24.051
	rs6699436	G	20.1393
	rs74435620	G	20.7552
	rs74949421	G	19.4861
	rs9623661	T	21.2984
IL-2	rs10131977	C	19.724
	rs10903540	A	21.2459
	rs117586932	T	20.1675
	rs12051139	C	20.9668
	rs13412535	A	28.2307
	rs16836080	A	20.5156
	rs170117	T	21.4669
	rs17715887	T	19.7164
	rs2807544	G	21.5692
	rs34431714	A	20.697
	rs4634519	G	21.9748
	rs61335305	A	24.179
	rs62124990	T	21.6801
	rs7615304	G	23.4544
	rs77351942	C	19.6988
	rs80336398	C	21.7452
IL2ra	rs11241559	G	22.5804
	rs115360066	G	24.2667
	rs117026681	A	21.0324
	rs117244812	A	22.537
	rs12722497	A	167.609
	rs12799226	T	20.4447
	rs185231391	C	22.0936
	rs4733117	C	21.9807
	rs56192581	A	20.4705
	rs61705228	T	21.281
	rs62305210	G	20.4195
	rs623264	G	19.9387
	rs72767608	C	19.619
	rs73001149	C	20.5068
	rs73910487	A	19.5113
	rs77313297	T	20.6147
IL-4	rs10512267	C	26.1941
	rs116705532	G	22.8793
	rs11709228	C	19.9916
	rs12091966	G	20.3818
	rs13106889	A	26.6256
	rs17713451	A	25.357
	rs2073438	A	19.9091
	rs2849346	G	21.7778
	rs4444693	A	22.9254
	rs6969391	C	20.6861
	rs73023729	A	24.0797
	rs75924875	G	20.2967
	rs7613691	G	21.3665
	rs78876292	T	19.7059
	rs79597994	T	21.0804
	rs9508291	C	21.7951
	rs9941733	G	24.7821
IL-5	rs10454319	G	19.8318
	rs116264291	A	19.4234
	rs11680908	G	22.6054
	rs12635407	A	20.2833
	rs144467962	G	19.3987
	rs148634917	G	21.0548
	rs28793375	T	20.8368
	rs6737109	C	22.0558
	rs73040130	C	24.8678
	rs74811276	A	20.5257
	rs7767396	G	37.9276
IL-6	rs10982213	A	20.7646
	rs12079357	G	20.217
	rs1333040	T	21.8172
	rs13412535	A	29.3109
	rs141772556	T	19.5642
	rs2404476	A	19.9359
	rs4684700	T	19.5888
	rs72831623	A	28.1299
	rs73273528	T	23.3465
	rs76856708	C	22.0766
IL-7	rs115215018	T	21.1107
	rs11662005	G	19.367
	rs117509142	C	22.5901
	rs11774096	A	19.7163
	rs12117072	T	20.7885
	rs141425475	C	22.1437
	rs144701438	A	23.7422
	rs147747784	C	28.2346
	rs17091524	C	23.6275
	rs2095309	G	20.0475
	rs218247	C	22.3471
	rs28793375	T	20.588
	rs4320361	T	169.836
	rs62006410	T	26.4054
	rs6707510	G	19.7267
	rs75904417	C	23.6714
	rs77981494	C	23.6832
	rs78346957	A	20.7581
	rs8175379	A	21.0311
IL-8	rs11634944	C	23.2079
	rs116726256	C	19.7853
	rs12075	A	25.8546
	rs12960757	A	20.4649
	rs141926526	C	22.1001
	rs144929914	A	19.7497
	rs17866606	T	19.5657
	rs2552220	A	19.9194
	rs2651759	G	19.8738
	rs2673604	A	24.6483
	rs3786107	G	20.4055
	rs7132236	A	20.5898
	rs75840288	C	19.9253
	rs79274420	G	20.5016
IL-9	rs10982712	T	20.3966
	rs115201696	C	20.2392
	rs17317275	G	20.1903
	rs186112202	G	20.323
	rs187422429	C	20.5976
	rs3957147	T	20.5008
	rs41294750	T	22.0699
	rs4880409	T	21.5332
	rs61335305	A	19.5319
	rs61867538	T	21.2266
	rs7232268	G	22.0916
	rs7242404	A	21.6366
	rs72819454	T	20.2439
	rs73218490	T	20.1132
	rs73443903	A	20.5029
	rs76963786	T	26.4569
IL-10	rs10457128	A	25.2915
	rs10493718	A	24.5516
	rs11206302	T	22.4397
	rs1530455	C	20.7705
	rs2086656	T	21.2893
	rs282258	C	37.4967
	rs3025021	C	23.5847
	rs41282660	G	21.9244
	rs4345303	C	20.7916
	rs4349809	G	298.976
	rs465757	A	23.3056
	rs6799107	C	20.601
	rs7088799	G	26.0283
	rs9951418	A	20.2274
	rs9981861	C	19.62
IL-12p70	rs10958542	A	19.636
	rs117607213	C	20.8844
	rs13209117	A	29.0208
	rs137921	C	19.823
	rs144160960	A	20.2995
	rs17229494	G	20.7964
	rs1996152	T	19.7748
	rs273702	G	20.6183
	rs282258	C	21.8976
	rs41282644	A	23.4779
	rs4349809	G	564.287
	rs4886671	C	20.5574
	rs6532374	C	19.9722
	rs71361173	G	21.57
	rs72831623	A	26.7317
	rs782107	A	23.1139
	rs79121401	C	21.1631
	rs9472183	G	42.1259
IL-13	rs10995614	C	20.6323
	rs117795020	A	24.1965
	rs12623722	A	21.0959
	rs139083458	T	22.086
	rs142167313	C	25.7347
	rs17647312	T	19.8636
	rs17722688	C	19.8399
	rs27949	T	21.4825
	rs29545	T	20.4865
	rs6799107	C	23.4951
	rs7073807	C	22.323
	rs72772212	T	19.6028
	rs73322775	G	20.9019
	rs75904417	C	19.8549
	rs75954784	T	20.1795
	rs75995699	A	22.6102
	rs78346957	A	20.0886
	rs9472168	G	292.851
IL-16	rs117217798	T	21.0276
	rs11787273	T	20.5798
	rs117916513	A	25.9211
	rs1255143	T	29.1243
	rs12765671	A	20.8831
	rs140996761	G	20.1621
	rs144691581	A	25.4884
	rs1801020	G	40.5938
	rs4253283	C	31.053
	rs4513633	A	24.4293
	rs4778636	A	131.978
	rs72987269	T	20.3285
	rs9706053	T	24.1701
IL-17	rs117556572	T	21.5519
	rs12735700	T	20.4251
	rs1446499	C	19.5069
	rs149738638	C	20.1171
	rs1530455	C	38.9722
	rs17106604	T	25.1781
	rs17282552	C	24.4109
	rs184080173	C	25.6195
	rs187475560	T	21.9096
	rs57920188	G	20.4788
	rs62191444	T	21.1526
	rs78296352	T	21.9563
	rs78612928	C	21.8198
IL-18	rs10414578	T	25.6036
	rs115267715	T	31.7532
	rs116383510	C	26.4017
	rs11700536	T	21.3814
	rs117266781	T	21.7164
	rs13065560	A	19.7284
	rs1445003	C	19.5734
	rs17229943	C	45.4096
	rs1852105	C	21.096
	rs1979967	T	24.0306
	rs2729385	A	22.0757
	rs385076	C	96.1665
	rs4482818	G	27.7781
	rs62425821	A	19.7872
	rs658805	A	25.2465
	rs71478720	T	93.5145
	rs78623212	T	23.9703
	rs78716465	A	22.9191
bNGF	rs1334726	G	19.6658
	rs1390897	G	20.0293
	rs28637706	T	36.5037
	rs3102215	C	19.6772
	rs4963227	T	19.5792
	rs66515854	C	20.1464
	rs67476890	T	21.786
	rs71641308	T	22.365
	rs72701786	A	20.1008
	rs72780728	A	21.8319
	rs74966328	A	22.478
	rs7970581	G	23.9475
	rs9436119	A	20.7654
CTACK	rs10820706	T	19.4994
	rs116303454	A	22.0301
	rs118084576	A	20.2829
	rs145902143	G	23.8601
	rs17337873	A	20.1467
	rs2070074	G	142.656
	rs208623	C	20.7924
	rs2731674	G	24.9251
	rs3766110	C	21.4322
	rs55764737	C	29.8777
	rs57338032	G	24.9369
	rs57789542	C	20.1255
	rs60247384	T	20.0501
	rs7333764	T	21.8671
	rs76395525	A	23.742
	rs77240236	T	20.458
	rs77557587	T	19.7455
Eotaxin	rs11087905	A	24.7888
	rs112347425	T	32.5353
	rs11253668	A	19.6052
	rs112742093	C	20.1965
	rs12075	A	114.737
	rs12386893	T	19.598
	rs1402031	C	19.4839
	rs144029336	A	18.5732
	rs1476670	C	21.5347
	rs17116545	G	21.0101
	rs2024050	G	32.5239
	rs2027855	T	20.6408
	rs2210755	C	20.8117
	rs2211904	G	20.7237
	rs2211994	C	25
	rs2228467	C	203.258
	rs2419841	C	20.9495
	rs5746492	G	21.2401
	rs5754733	A	23.7087
	rs59808887	T	21.8387
	rs745331	A	20.0218
	rs75426604	A	22.0351
	rs79722574	T	23.8298
	rs80341932	G	24.5629
	rs9317045	C	24.8736
FGFBasic	rs112254257	C	18.7369
	rs1144789	G	20.3049
	rs13131381	C	19.8554
	rs13412535	A	24.4256
	rs1530455	C	19.7136
	rs2292368	T	20.1035
	rs62305808	A	19.7531
	rs747334	G	20.9697
	rs75168112	C	21.8797
	rs78695355	T	19.6691
	rs78873483	A	20.6816
	rs9907295	T	24.0428
GCSF	rs114588192	T	20.0749
	rs115256310	G	25.1547
	rs117261691	T	20.2813
	rs11903143	G	24.435
	rs147128865	T	21.1569
	rs1817411	T	21.7127
	rs1941489	T	20.7531
	rs2671444	A	22.3057
	rs586313	C	20.2022
	rs6446626	A	20.5322
	rs74148555	T	24.2116
	rs76287671	T	24.631
	rs77318030	C	22.8296
	rs9785172	C	20.3806
GROa	rs1113500	T	23.1503
	rs111596460	T	19.5497
	rs114262236	A	20.2694
	rs114991247	C	20.0673
	rs11715515	A	20.2029
	rs118158560	A	20.7071
	rs12075	A	250.494
	rs140734053	A	21.6127
	rs17137580	G	19.7848
	rs188345231	T	22.1746
	rs2422841	A	21.0684
	rs2836049	T	20.0907
	rs508977	G	184.378
	rs62024303	G	21.0138
	rs722178	T	20.3954
	rs78653452	T	22.3284
HGF	rs11060254	A	22.9481
	rs1163518	T	20.2749
	rs13412535	A	19.707
	rs150322232	G	20.6504
	rs1698249	C	20.8348
	rs2003620	T	21.7206
	rs3748034	T	40.8179
	rs57146176	A	20.3146
	rs5745687	T	57.252
	rs62481625	C	23.5117
	rs6902174	A	19.9896
	rs75471743	G	19.6961
IFNg	rs10487554	A	23.919
	rs112783231	A	22.206
	rs113600793	A	24.0442
	rs115729819	G	23.2642
	rs11843756	G	21.9205
	rs12420286	C	22.4914
	rs142783128	T	19.4915
	rs1867282	T	21.7403
	rs2073438	A	22.8159
	rs72910442	T	20.4891
	rs74148555	T	23.2488
	rs78296352	T	27.6753
IP10	rs10758800	G	20.0035
	rs10809307	C	21.4152
	rs113831257	A	31.1101
	rs11626201	A	22.4947
	rs143799975	G	23.7872
	rs34383175	T	23.0312
	rs4862110	C	20.7594
	rs5758022	A	20.1786
	rs5758022	A	20.1786
	rs6707974	G	19.9053
	rs7645625	G	20.9973
	rs79275043	A	19.8751
	rs79848609	C	23.4963
	rs8112909	A	22.7456
	rs9450351	C	32.0416
MCP1	rs10145849	A	21.7202
	rs10744620	C	23.9552
	rs111884151	T	19.0566
	rs111995966	G	21.9386
	rs112313229	A	27.6548
	rs113089229	A	20.0014
	rs117218154	C	19.8446
	rs12073356	A	21.0241
	rs12075	A	198.719
	rs12493471	C	51.5382
	rs146522229	T	25.7791
	rs147958317	T	19.1094
	rs149470547	C	20.0139
	rs2228467	C	82.1172
	rs2712431	A	20.9359
	rs56212190	T	23.5472
	rs61499291	C	19.4434
	rs66694737	A	19.5659
	rs6694978	T	19.6673
	rs7197349	G	22.0809
	rs7517040	G	26.7035
	rs75265958	G	20.6337
	rs9317045	C	23.0888
MCP3	rs10892381	T	25.6768
	rs113065532	T	20.494
	rs1202138	G	19.569
	rs149026780	C	19.6271
	rs2838065	G	20.1476
	rs3129806	T	21.063
	rs596183	A	19.9249
	rs62492260	T	23.1063
	rs73011251	C	19.5125
	rs73669117	G	22.675
MCSF	rs116274860	G	22.1294
	rs117283853	G	19.6465
	rs12962919	T	21.2546
	rs13108768	T	20.3304
	rs145778765	T	22.3955
	rs192643599	G	20.25
	rs34089869	T	20.9626
	rs34224906	T	17.6392
	rs56050471	C	20.2043
	rs56367447	T	31.6422
	rs62294910	A	24.6539
	rs78296352	T	22.4601
	rs9387100	C	21.4382
MIF	rs11084300	T	19.7394
	rs116336492	G	18.8921
	rs118055855	C	21.203
	rs12594190	G	25.7547
	rs138752705	T	19.7847
	rs141009259	C	21.839
	rs2933188	G	20.5594
	rs35890933	G	20.1398
	rs591584	A	19.8496
	rs6894189	G	19.4719
	rs72982121	A	20.5433
	rs7807224	T	19.6796
	rs78098071	C	28.1085
MIG	rs111607343	A	21.6778
	rs11177248	A	21.0366
	rs112337562	G	21.6061
	rs112861654	G	27.3199
	rs117831247	T	22.576
	rs13094143	T	20.4379
	rs139010077	T	20.6977
	rs147642366	T	17.2427
	rs1796086	C	27.0503
	rs41272086	A	28.7709
	rs55876513	G	42.3775
	rs5752128	C	20.852
	rs62562991	A	24.4946
	rs6679677	A	24.2459
	rs77086208	T	21.3608
	rs816960	T	25.1642
MIP1a	rs10835056	G	22.0974
	rs113889446	A	20.25
	rs116615337	A	20.9823
	rs12690897	A	22.6896
	rs12973634	C	19.4319
	rs137875	G	19.5008
	rs184154340	A	22.8134
	rs2682471	G	20.4104
	rs33202	G	19.9164
	rs34771762	G	22.6671
	rs55723389	T	19.2792
	rs57786342	A	21.257
	rs60198979	A	21.9547
	rs6900267	A	21.9038
	rs7232268	G	22.1795
	rs7242404	A	20.5715
	rs74737187	G	20.4749
MIP1b	rs11130043	A	21.6788
	rs113010081	C	636.493
	rs113877493	T	789.146
	rs115962808	C	20.4896
	rs116237296	A	23.7777
	rs117453826	G	94.8078
	rs141102180	T	67.3402
	rs17138331	G	22.2336
	rs17641689	G	69.8052
	rs2079664	G	31.961
	rs281749	C	21.8324
	rs34437725	C	29.7172
	rs55915659	A	20.2592
	rs58969369	G	19.6824
	rs6908843	G	20.2715
	rs7251275	T	19.7999
	rs72791296	T	25.8439
	rs72799710	T	21.6353
	rs74810984	C	21.6598
	rs75697268	C	19.9756
	rs76582507	A	21.9943
	rs76583883	T	20.5594
	rs76776296	G	25.1172
	rs79243092	T	20.4591
	rs9793308	G	22.0056
PDGFbb	rs10829477	T	20.3238
	rs116445074	T	24.9319
	rs11766649	G	21.4615
	rs11916118	G	20.9991
	rs12289510	G	24.3711
	rs12515788	T	20.3193
	rs13412535	A	245.347
	rs182914552	C	20.2059
	rs2324229	C	30.8335
	rs35859699	A	22.0298
	rs4965869	T	103.342
	rs55680718	T	31.6063
	rs72777070	G	28.569
	rs73162807	A	22.9593
	rs9936075	G	22.7366
	rs9941733	G	25.9295
RANTES	rs10809191	C	19.7752
	rs10899562	G	19.7989
	rs112072646	A	24.7224
	rs144099278	T	19.7767
	rs147509526	T	24.9303
	rs2731672	C	20.2006
	rs4940620	G	21.3307
	rs55890718	G	19.8107
	rs62438851	G	22.345
	rs7000423	T	27.1387
	rs72793342	A	23.3088
	rs74472919	T	29.9869
	rs7455952	G	20.4598
	rs75613039	T	20.8657
	rs818452	T	22.2298
SCF	rs10146616	A	19.8341
	rs113127926	A	22.2694
	rs117389875	T	19.9326
	rs13412535	A	25.094
	rs1557570	T	48.6711
	rs1568119	T	27.3652
	rs1942355	T	20.7982
	rs4841899	C	31.8147
	rs552446	T	19.7564
	rs56406844	A	20.5799
	rs6580585	G	19.9012
	rs7676737	T	20.5932
	rs78369473	T	20.6697
	rs78666213	G	22.6946
	rs80271436	A	23.8788
SCGFb	rs112346514	T	21.7253
	rs1149926	T	20.3402
	rs116924815	T	67.8503
	rs117716477	A	99.3826
	rs12480722	C	20.9274
	rs139413256	A	24.6049
	rs143829871	C	22.61
	rs149009264	G	20.714
	rs150733161	T	22.6895
	rs151194174	A	24.2102
	rs17876031	G	35.251
	rs226836	T	20.0293
	rs264162	G	21.9777
	rs34017685	T	20.3166
	rs34911860	A	21.6951
	rs4656185	A	64.1251
	rs4737732	G	20.7169
	rs6726057	A	20.5097
	rs703632	A	19.5196
	rs72967121	T	19.4897
	rs7762066	C	21.5805
	rs77954165	C	20.8104
	rs78217154	C	21.4013
	rs9365267	C	20.782
SDF1a	rs10474392	G	29.2086
	rs10876525	C	14.527
	rs117286758	A	15.0967
	rs118180610	T	14.3407
	rs11822132	A	14.3805
	rs12191715	G	16.8164
	rs12407262	A	19.6456
	rs12810737	C	16.7979
	rs13400104	G	11.7188
	rs139840550	A	11.1597
	rs149893336	G	21.6858
	rs4581824	G	16.4189
	rs482700	A	19.3513
	rs67689854	A	12.1962
	rs6773330	G	15.0883
	rs78411870	C	14.5968
	rs9267091	A	14.8016
TNFa	rs10511404	A	20.2349
	rs10814274	T	19.7733
	rs10834997	A	23.3611
	rs111332265	G	24.947
	rs116434579	A	19.9497
	rs72490194	T	20.1149
	rs72841564	T	20.0187
	rs79105320	A	22.6008
	rs8121916	A	22.0697
TNFb	rs10925040	T	22.1379
	rs115424381	A	20.7343
	rs139568	C	19.6225
	rs28535566	T	19.8569
	rs35781474	C	19.6332
	rs753274	T	21.8953
	rs7629875	G	23.6744
	rs78296352	T	79.9623
TRAIL	rs11618126	G	21.6609
	rs11657269	G	20.8779
	rs116908580	C	20.035
	rs11699445	G	21.4697
	rs13185784	A	21.3717
	rs13236967	C	19.4808
	rs13278062	T	26.0295
	rs146783010	G	19.8586
	rs148051545	T	21.3797
	rs17434886	T	20.1152
	rs193112415	C	279.797
	rs4760	G	21.3418
	rs57396456	C	117.961
	rs62093514	T	370.005
	rs72761145	T	20.5364
	rs73039026	C	22.3052
	rs747324	C	23.0724
	rs74778900	T	123.243
	rs75928541	A	21.5058
	rs79287178	A	105.148
VEGF	rs10153304	A	22.6576
	rs10886366	G	20.5008
	rs10934631	C	22.0708
	rs10948108	C	20.4244
	rs10967186	C	27.9033
	rs117580153	T	20.2621
	rs12456390	C	20.5008
	rs13209117	A	41.9595
	rs143479231	A	27.9972
	rs144160960	A	19.8164
	rs4082730	A	22.3053
	rs61829244	A	20.1018
	rs6921438	A	784
	rs73081996	G	19.6634
	rs73418461	A	22.8781
	rs73872715	T	20.7129
	rs77899560	G	20.8275
	rs8045833	A	26.1989
	rs9472183	G	56.8693
* Approximated F-statistic (Pierce et al., 2011) representing instrument strength calculated using the formula: beta2 / standard error2.

## Sheet: Tab S3
Supplementary Table S3: Data source of the risk factors related to pregnancy outcomes
Traits	Consortium	Sample size	Ancestry
type 2 diabetes	UK Biobank	462933	European
systolic blood pressure	UK Biobank	436419	European
smoking	UK Biobank	425516	European
height	UK Biobank	461950	European
body mass index	UK Biobank	461460	European

## Sheet: Tab S4
Supplementary Table S4: The effect estimates and 95% CI for MR associations between circulation levels of cytokines and birthweight (BW)
Exposure	Method	Beta (95% C.I.)	P-value
IL-1b	IVW	0.000 (-0.054, 0.053)	0.991
	Weighted Median	-0.010 (-0.074, 0.053)	0.746
	MR Egger	-0.072 (-0.197, 0.053)	0.309
IL1ra	IVW	-0.011 (-0.046, 0.023)	0.517
	Weighted Median	-0.030 (-0.073, 0.013)	0.174
	MR Egger	-0.037 (-0.141, 0.067)	0.505
IL-2	IVW	0.018 (-0.007, 0.042)	0.166
	Weighted Median	0.018 (-0.017, 0.053)	0.318
	MR Egger	0.021 (-0.028, 0.070)	0.416
IL2ra	IVW	-0.012 (-0.033, 0.009)	0.274
	Weighted Median	-0.019 (-0.048, 0.009)	0.178
	MR Egger	-0.044 (-0.078, -0.011)	0.021a
IL-4	IVW	0.019 (-0.017, 0.055)	0.306
	Weighted Median	0.021 (-0.028, 0.071)	0.398
	MR Egger	-0.001 (-0.065, 0.062)	0.970
IL-5	IVW	-0.020 (-0.053, 0.013)	0.240
	Weighted Median	-0.025 (-0.064, 0.014)	0.214
	MR Egger	-0.020 (-0.101, 0.061)	0.637
IL-6	IVW	-0.010 (-0.056, 0.035)	0.652
	Weighted Median	-0.032 (-0.091, 0.028)	0.302
	MR Egger	0.015 (-0.076, 0.106)	0.758
IL-7	IVW	0.007 (-0.020, 0.033)	0.616
	Weighted Median	0.008 (-0.023, 0.040)	0.602
	MR Egger	-0.003 (-0.056, 0.051)	0.917
IL-8	IVW	0.001 (-0.022, 0.023)	0.952
	Weighted Median	-0.003 (-0.033, 0.027)	0.859
	MR Egger	-0.005 (-0.045, 0.035)	0.798
IL-9	IVW	0.007 (-0.019, 0.033)	0.594
	Weighted Median	-0.001 (-0.035, 0.034)	0.971
	MR Egger	-0.002 (-0.063, 0.060)	0.956
IL-10	IVW	-0.003 (-0.034, 0.029)	0.870
	Weighted Median	0.004 (-0.035, 0.042)	0.852
	MR Egger	0.008 (-0.065, 0.081)	0.839
IL-12p70	IVW	0.011 (-0.019, 0.040)	0.487
	Weighted Median	0.004 (-0.028, 0.036)	0.808
	MR Egger	-0.010 (-0.061, 0.041)	0.704
IL-13	IVW	0.005 (-0.017, 0.026)	0.666
	Weighted Median	0.004 (-0.023, 0.031)	0.757
	MR Egger	0.009 (-0.031, 0.049)	0.661
IL-16	IVW	0.014 (-0.005, 0.033)	0.146
	Weighted Median	0.010 (-0.014, 0.034)	0.407
	MR Egger	0.003 (-0.028, 0.033)	0.874
IL-17	IVW	-0.001 (-0.041, 0.039)	0.954
	Weighted Median	-0.003 (-0.053, 0.046)	0.894
	MR Egger	0.013 (-0.078, 0.105)	0.780
IL-18	IVW	0.009 (-0.014, 0.032)	0.443
	Weighted Median	0.014 (-0.017, 0.045)	0.374
	MR Egger	-0.020 (-0.065, 0.025)	0.401
bNGF	IVW	-0.013 (-0.043, 0.016)	0.370687
	Weighted Median	-0.014 (-0.055, 0.027)	0.508788
	MR Egger	0.051 (-0.065, 0.167)	0.405906
CTACK	IVW	-0.016 (-0.037, 0.004)	0.125011
	Weighted Median	-0.020 (-0.049, 0.008)	0.161263
	MR Egger	-0.016 (-0.054, 0.023)	0.438574
Eotaxin	IVW	0.002 (-0.024, 0.028)	0.881395
	Weighted Median	0.003 (-0.034, 0.039)	0.888997
	MR Egger	-0.001 (-0.060, 0.058)	0.975231
FGFBasic	IVW	0.024 (-0.020, 0.069)	0.28587
	Weighted Median	-0.002 (-0.062, 0.058)	0.947058
	MR Egger	0.167 (0.000, 0.333)	0.0781636
GCSF	IVW	-0.001 (-0.037, 0.035)	0.963407
	Weighted Median	-0.021 (-0.073, 0.031)	0.41897
	MR Egger	0.028 (-0.032, 0.087)	0.378925
GROa	IVW	0.004 (-0.014, 0.022)	0.692099
	Weighted Median	0.000 (-0.022, 0.022)	0.981072
	MR Egger	-0.022 (-0.060, 0.015)	0.256423
HGF	IVW	0.028 (-0.012, 0.067)	0.166281
	Weighted Median	0.032 (-0.016, 0.081)	0.193404
	MR Egger	0.036 (-0.051, 0.124)	0.435464
IFNg	IVW	0.041 (-0.002, 0.084)	0.0644369
	Weighted Median	0.041 (-0.019, 0.100)	0.179837
	MR Egger	0.069 (-0.015, 0.152)	0.136717
IP10	IVW	0.026 (0.000, 0.052)	0.0536081
	Weighted Median	0.038 (0.003, 0.073)	0.035a
	MR Egger	0.038 (-0.018, 0.094)	0.205312
MCP1	IVW	-0.010 (-0.035, 0.016)	0.45991
	Weighted Median	-0.014 (-0.053, 0.025)	0.476748
	MR Egger	0.002 (-0.053, 0.057)	0.952636
MCP3	IVW	-0.006 (-0.024, 0.011)	0.483514
	Weighted Median	-0.012 (-0.035, 0.011)	0.313475
	MR Egger	0.010 (-0.034, 0.053)	0.666597
MCSF	IVW	-0.020 (-0.041, 0.000)	0.046a
	Weighted Median	-0.020 (-0.048, 0.007)	0.15
	MR Egger	-0.005 (-0.042, 0.031)	0.78
MIF	IVW	0.002 (-0.026, 0.030)	0.877
	Weighted Median	0.010 (-0.027, 0.048)	0.589
	MR Egger	0.034 (-0.014, 0.083)	0.194
MIG	IVW	-0.016 (-0.044, 0.012)	0.257
	Weighted Median	-0.033 (-0.064, -0.001)	0.042a
	MR Egger	-0.048 (-0.095, -0.001)	0.066
MIP1a	IVW	0.001 (-0.031, 0.033)	0.947
	Weighted Median	-0.012 (-0.050, 0.026)	0.536
	MR Egger	-0.032 (-0.112, 0.047)	0.437
MIP1b	IVW	-0.031 (-0.053, -0.010)	0.005a
	Weighted Median	-0.027 (-0.053, 0.000)	0.046a
	MR Egger	-0.016 (-0.047, 0.015)	0.325
PDGFbb	IVW	-0.011 (-0.039, 0.017)	0.443
	Weighted Median	0.005 (-0.033, 0.043)	0.812
	MR Egger	-0.015 (-0.068, 0.039)	0.603
RANTES	IVW	0.015 (-0.012, 0.042)	0.275
	Weighted Median	0.003 (-0.035, 0.040)	0.894
	MR Egger	0.016 (-0.054, 0.086)	0.659
SCF	IVW	0.001 (-0.037, 0.038)	0.979
	Weighted Median	0.008 (-0.043, 0.058)	0.763
	MR Egger	0.062 (-0.016, 0.139)	0.142
SCGFb	IVW	-0.003 (-0.022, 0.016)	0.766
	Weighted Median	-0.010 (-0.037, 0.017)	0.473
	MR Egger	0.018 (-0.018, 0.054)	0.330
SDF1a	IVW	-0.051 (-0.090, -0.013)	0.009a
	Weighted Median	-0.082 (-0.134, -0.030)	0.002a,b
	MR Egger	-0.091 (-0.173, -0.009)	0.046a
TNFa	IVW	0.001 (-0.038, 0.040)	0.973
	Weighted Median	0.007 (-0.036, 0.050)	0.747
	MR Egger	-0.006 (-0.097, 0.084)	0.896
TNFb	IVW	-0.009 (-0.029, 0.010)	0.336
	Weighted Median	-0.012 (-0.036, 0.013)	0.344
	MR Egger	-0.010 (-0.042, 0.023)	0.575
TRAIL	IVW	-0.008 (-0.027, 0.011)	0.402
	Weighted Median	-0.002 (-0.027, 0.024)	0.892
	MR Egger	0.002 (-0.022, 0.026)	0.879
VEGF	IVW	0.002 (-0.016, 0.019)	0.856
	Weighted Median	-0.002 (-0.022, 0.018)	0.847
	MR Egger	-0.004 (-0.032, 0.024)	0.793
a. P<0.05, b.Surpass the Bonferroni-corrected p-value threshold

## Sheet: Tab S5
Supplementary Table S5: ORs (95% CIs) for MR associations between circulation levels of cytokines and preterm birth (PTB)
Exposure	Method	Odds Ratio (95% C.I.)	P-value
IL-1b	IVW	1.08 (0.93, 1.25)	0.311
	Weighted Median	1.05 (0.87, 1.26)	0.608
	MR Egger	1.23 (0.85, 1.78)	0.313
IL1ra	IVW	1.03 (0.93, 1.15)	0.534
	Weighted Median	1.01 (0.87, 1.17)	0.872
	MR Egger	0.95 (0.70, 1.28)	0.741
IL-2	IVW	1.06 (0.97, 1.16)	0.169
	Weighted Median	1.07 (0.94, 1.20)	0.304
	MR Egger	1.12 (0.94, 1.33)	0.229
IL2ra	IVW	0.98 (0.90, 1.06)	0.615
	Weighted Median	1.00 (0.90, 1.11)	0.980
	MR Egger	1.02 (0.88, 1.18)	0.805
IL-4	IVW	1.08 (0.92, 1.27)	0.342
	Weighted Median	1.05 (0.85, 1.28)	0.672
	MR Egger	1.08 (0.76, 1.53)	0.685
IL-5	IVW	1.08 (0.97, 1.21)	0.163
	Weighted Median	1.08 (0.95, 1.23)	0.243
	MR Egger	1.13 (0.88, 1.46)	0.359
IL-6	IVW	1.07 (0.89, 1.29)	0.463
	Weighted Median	1.08 (0.86, 1.35)	0.511
	MR Egger	1.20 (0.81, 1.78)	0.376
IL-7	IVW	1.04 (0.96, 1.12)	0.356
	Weighted Median	1.04 (0.93, 1.15)	0.491
	MR Egger	1.11 (0.95, 1.31)	0.215
IL-8	IVW	1.03 (0.91, 1.16)	0.646
	Weighted Median	1.17 (1.02, 1.35)	0.030
	MR Egger	1.06 (0.82, 1.36)	0.685
IL-9	IVW	1.05 (0.94, 1.18)	0.395
	Weighted Median	1.01 (0.88, 1.16)	0.873
	MR Egger	0.86 (0.68, 1.10)	0.254
IL-10	IVW	1.07 (0.97, 1.17)	0.182
	Weighted Median	1.04 (0.93, 1.18)	0.481
	MR Egger	1.05 (0.86, 1.29)	0.619
IL-12p70	IVW	1.02 (0.94, 1.11)	0.591
	Weighted Median	1.03 (0.93, 1.13)	0.555
	MR Egger	1.02 (0.89, 1.17)	0.813
IL-13	IVW	1.02 (0.96, 1.09)	0.550
	Weighted Median	1.03 (0.95, 1.12)	0.452
	MR Egger	0.97 (0.85, 1.10)	0.618
IL-16	IVW	0.97 (0.89, 1.06)	0.562
	Weighted Median	1.02 (0.92, 1.13)	0.724
	MR Egger	1.02 (0.87, 1.20)	0.781
IL-17	IVW	1.00 (0.89, 1.12)	0.986
	Weighted Median	0.99 (0.85, 1.15)	0.877
	MR Egger	1.04 (0.82, 1.33)	0.731
IL-18	IVW	1.00 (0.94, 1.07)	0.998
	Weighted Median	0.97 (0.89, 1.06)	0.516
	MR Egger	1.04 (0.90, 1.20)	0.600
bNGF	IVW	1.08 (0.98, 1.20)	0.124
	Weighted Median	1.15 (1.01, 1.32)	0.040
	MR Egger	1.06 (0.66, 1.71)	0.822
CTACK	IVW	1.01 (0.92, 1.12)	0.813
	Weighted Median	0.96 (0.85, 1.07)	0.451
	MR Egger	0.98 (0.80, 1.19)	0.809
Eotaxin	IVW	0.99 (0.89, 1.11)	0.868
	Weighted Median	1.00 (0.87, 1.14)	0.977
	MR Egger	1.01 (0.79, 1.29)	0.966
FGFBasic	IVW	0.97 (0.84, 1.11)	0.635
	Weighted Median	0.94 (0.78, 1.13)	0.494
	MR Egger	0.88 (0.60, 1.30)	0.533
GCSF	IVW	0.97 (0.85, 1.10)	0.600
	Weighted Median	0.95 (0.81, 1.12)	0.546
	MR Egger	0.91 (0.72, 1.14)	0.431
GROa	IVW	0.92 (0.87, 0.97)	0.004a
	Weighted Median	0.93 (0.86, 1.00)	0.056a
	MR Egger	0.94 (0.82, 1.07)	0.352
HGF	IVW	1.10 (0.95, 1.26)	0.202
	Weighted Median	1.17 (0.96, 1.43)	0.121
	MR Egger	0.99 (0.72, 1.36)	0.947
IFNg	IVW	1.05 (0.89, 1.23)	0.547
	Weighted Median	1.04 (0.85, 1.28)	0.710
	MR Egger	1.01 (0.72, 1.41)	0.955
IP10	IVW	1.03 (0.92, 1.14)	0.630
	Weighted Median	0.99 (0.87, 1.13)	0.924
	MR Egger	1.12 (0.89, 1.42)	0.357
MCP1	IVW	0.94 (0.87, 1.03)	0.168
	Weighted Median	0.89 (0.79, 1.01)	0.075
	MR Egger	0.89 (0.74, 1.08)	0.267
MCP3	IVW	0.98 (0.93, 1.05)	0.597
	Weighted Median	1.01 (0.93, 1.09)	0.889
	MR Egger	0.86 (0.74, 1.01)	0.097
MCSF	IVW	0.98 (0.90, 1.06)	0.556
	Weighted Median	1.00 (0.91, 1.11)	0.955
	MR Egger	1.01 (0.87, 1.17)	0.876
MIF	IVW	1.04 (0.96, 1.14)	0.341
	Weighted Median	1.09 (0.97, 1.22)	0.136
	MR Egger	1.00 (0.84, 1.19)	0.998
MIG	IVW	1.03 (0.96, 1.12)	0.403
	Weighted Median	1.05 (0.94, 1.17)	0.367
	MR Egger	1.01 (0.87, 1.19)	0.860
MIP1a	IVW	1.01 (0.90, 1.12)	0.922
	Weighted Median	1.03 (0.91, 1.17)	0.616
	MR Egger	0.99 (0.76, 1.29)	0.959
MIP1b	IVW	1.03 (0.97, 1.08)	0.348
	Weighted Median	1.03 (0.96, 1.10)	0.481
	MR Egger	1.00 (0.93, 1.09)	0.925
PDGFbb	IVW	0.96 (0.87, 1.05)	0.318
	Weighted Median	0.97 (0.85, 1.09)	0.578
	MR Egger	1.04 (0.87, 1.24)	0.693
RANTES	IVW	1.09 (0.99, 1.21)	0.077
	Weighted Median	1.10 (0.97, 1.24)	0.129
	MR Egger	0.92 (0.72, 1.19)	0.544
SCF	IVW	0.95 (0.82, 1.11)	0.535
	Weighted Median	1.04 (0.87, 1.25)	0.670
	MR Egger	0.96 (0.65, 1.41)	0.833
SCGFb	IVW	1.03 (0.97, 1.10)	0.369
	Weighted Median	1.05 (0.96, 1.15)	0.297
	MR Egger	1.05 (0.93, 1.18)	0.431
SDF1a	IVW	1.03 (0.90, 1.18)	0.656
	Weighted Median	1.02 (0.84, 1.24)	0.856
	MR Egger	0.87 (0.64, 1.17)	0.358
TNFa	IVW	0.90 (0.81, 1.01)	0.065
	Weighted Median	0.89 (0.76, 1.03)	0.112
	MR Egger	0.92 (0.75, 1.14)	0.472
TNFb	IVW	1.06 (0.98, 1.15)	0.164
	Weighted Median	1.04 (0.94, 1.16)	0.460
	MR Egger	1.01 (0.86, 1.20)	0.881
TRAIL	IVW	0.96 (0.90, 1.02)	0.214
	Weighted Median	0.97 (0.89, 1.06)	0.496
	MR Egger	0.97 (0.89, 1.06)	0.500
VEGF	IVW	1.01 (0.95, 1.08)	0.681
	Weighted Median	1.03 (0.96, 1.11)	0.442
	MR Egger	1.01 (0.92, 1.12)	0.803
a. P<0.05, b.Surpass the Bonferroni-corrected p-value threshold

## Sheet: Tab S6
Supplementary Table S6: ORs (95% CIs) for MR associations between circulation levels of cytokines and spontaneous miscarriages (SMs)
Exposure	Method	Odds Ratio (95% C.I.)	P-value
IL-1b	IVW	1.17 (1.03, 1.33)	0.014a
	Weighted Median	1.21 (1.03, 1.43)	0.023a
	MR Egger	1.27 (0.91, 1.77)	0.216
IL1ra	IVW	0.95 (0.86, 1.06)	0.400
	Weighted Median	0.98 (0.88, 1.10)	0.756
	MR Egger	1.20 (0.92, 1.57)	0.209
IL-2	IVW	0.98 (0.92, 1.04)	0.488
	Weighted Median	0.98 (0.90, 1.07)	0.645
	MR Egger	1.04 (0.92, 1.18)	0.539
IL2ra	IVW	0.98 (0.93, 1.04)	0.516
	Weighted Median	0.99 (0.91, 1.07)	0.724
	MR Egger	1.01 (0.92, 1.12)	0.782
IL-4	IVW	0.96 (0.86, 1.07)	0.464
	Weighted Median	0.95 (0.82, 1.12)	0.555
	MR Egger	1.08 (0.86, 1.36)	0.527
IL-5	IVW	0.96 (0.89, 1.04)	0.296
	Weighted Median	0.94 (0.85, 1.04)	0.238
	MR Egger	0.92 (0.79, 1.09)	0.366
IL-6	IVW	1.07 (0.95, 1.21)	0.266
	Weighted Median	1.11 (0.94, 1.30)	0.215
	MR Egger	1.07 (0.84, 1.36)	0.612
IL-7	IVW	0.97 (0.91, 1.03)	0.276
	Weighted Median	0.97 (0.89, 1.05)	0.460
	MR Egger	0.94 (0.82, 1.06)	0.324
IL-8	IVW	1.06 (0.98, 1.14)	0.118
	Weighted Median	1.07 (0.97, 1.19)	0.171
	MR Egger	1.10 (0.94, 1.29)	0.256
IL-9	IVW	1.00 (0.93, 1.08)	0.965
	Weighted Median	0.98 (0.89, 1.09)	0.745
	MR Egger	1.12 (0.94, 1.33)	0.213
IL-10	IVW	1.00 (0.92, 1.09)	0.967
	Weighted Median	0.96 (0.87, 1.06)	0.389
	MR Egger	0.97 (0.81, 1.16)	0.754
IL-12p70	IVW	0.98 (0.92, 1.04)	0.464
	Weighted Median	0.97 (0.89, 1.05)	0.407
	MR Egger	0.99 (0.89, 1.10)	0.849
IL-13	IVW	0.98 (0.94, 1.03)	0.530
	Weighted Median	0.97 (0.91, 1.04)	0.411
	MR Egger	1.00 (0.90, 1.10)	0.922
IL-16	IVW	0.97 (0.90, 1.05)	0.463
	Weighted Median	1.01 (0.92, 1.10)	0.885
	MR Egger	0.96 (0.83, 1.11)	0.621
IL-17	IVW	1.11 (1.01, 1.21)	0.026a
	Weighted Median	1.11 (0.99, 1.26)	0.082
	MR Egger	1.11 (0.92, 1.35)	0.287
IL-18	IVW	0.97 (0.91, 1.03)	0.277
	Weighted Median	0.97 (0.90, 1.04)	0.380
	MR Egger	1.03 (0.91, 1.17)	0.675
bNGF	IVW	1.03 (0.95, 1.11)	0.521
	Weighted Median	1.02 (0.93, 1.13)	0.631
	MR Egger	1.09 (0.78, 1.51)	0.631
CTACK	IVW	1.02 (0.96, 1.08)	0.595
	Weighted Median	0.99 (0.91, 1.08)	0.856
	MR Egger	0.96 (0.86, 1.08)	0.506
Eotaxin	IVW	0.98 (0.92, 1.05)	0.599
	Weighted Median	0.96 (0.87, 1.06)	0.390
	MR Egger	0.93 (0.79, 1.08)	0.348
FGFBasic	IVW	1.05 (0.94, 1.17)	0.383
	Weighted Median	1.05 (0.91, 1.22)	0.514
	MR Egger	1.19 (0.88, 1.63)	0.284
GCSF	IVW	0.94 (0.85, 1.04)	0.226
	Weighted Median	0.91 (0.80, 1.05)	0.196
	MR Egger	0.83 (0.69, 1.00)	0.072
GROa	IVW	1.01 (0.97, 1.06)	0.552
	Weighted Median	1.00 (0.94, 1.07)	0.982
	MR Egger	1.04 (0.94, 1.15)	0.458
HGF	IVW	0.92 (0.83, 1.03)	0.164
	Weighted Median	0.99 (0.85, 1.15)	0.847
	MR Egger	1.09 (0.84, 1.40)	0.538
IFNg	IVW	1.00 (0.86, 1.15)	0.964
	Weighted Median	1.04 (0.87, 1.24)	0.665
	MR Egger	1.10 (0.82, 1.48)	0.549
IP10	IVW	1.01 (0.94, 1.08)	0.875
	Weighted Median	1.04 (0.95, 1.15)	0.392
	MR Egger	1.16 (1.00, 1.35)	0.074
MCP1	IVW	0.93 (0.87, 1.00)	0.037a
	Weighted Median	0.96 (0.87, 1.06)	0.453
	MR Egger	1.01 (0.86, 1.17)	0.921
MCP3	IVW	1.05 (1.00, 1.11)	0.038a
	Weighted Median	1.04 (0.98, 1.11)	0.207
	MR Egger	1.02 (0.90, 1.15)	0.766
MCSF	IVW	1.01 (0.96, 1.07)	0.606
	Weighted Median	0.98 (0.91, 1.06)	0.657
	MR Egger	0.95 (0.86, 1.05)	0.356
MIF	IVW	1.07 (0.99, 1.14)	0.070
	Weighted Median	1.06 (0.97, 1.16)	0.203
	MR Egger	1.07 (0.94, 1.23)	0.319
MIG	IVW	0.97 (0.90, 1.05)	0.425
	Weighted Median	0.92 (0.84, 1.01)	0.091
	MR Egger	1.01 (0.86, 1.18)	0.951
MIP1a	IVW	0.95 (0.88, 1.01)	0.109
	Weighted Median	0.93 (0.85, 1.02)	0.143
	MR Egger	0.97 (0.83, 1.14)	0.734
MIP1b	IVW	1.01 (0.97, 1.06)	0.596
	Weighted Median	1.01 (0.96, 1.07)	0.740
	MR Egger	1.02 (0.96, 1.09)	0.526
PDGFbb	IVW	0.97 (0.90, 1.04)	0.363
	Weighted Median	0.97 (0.87, 1.07)	0.490
	MR Egger	1.00 (0.87, 1.15)	0.977
RANTES	IVW	1.06 (0.97, 1.16)	0.210
	Weighted Median	0.99 (0.89, 1.08)	0.760
	MR Egger	0.87 (0.70, 1.07)	0.202
SCF	IVW	1.05 (0.95, 1.16)	0.353
	Weighted Median	1.04 (0.90, 1.19)	0.626
	MR Egger	0.90 (0.71, 1.14)	0.404
SCGFb	IVW	0.98 (0.93, 1.03)	0.403
	Weighted Median	0.98 (0.92, 1.05)	0.636
	MR Egger	0.97 (0.88, 1.07)	0.584
SDF1a	IVW	0.94 (0.85, 1.05)	0.305
	Weighted Median	0.98 (0.85, 1.14)	0.829
	MR Egger	0.92 (0.73, 1.16)	0.503
TNFa	IVW	1.02 (0.93, 1.12)	0.636
	Weighted Median	1.03 (0.92, 1.16)	0.602
	MR Egger	0.96 (0.81, 1.15)	0.706
TNFb	IVW	1.05 (0.99, 1.11)	0.143
	Weighted Median	1.05 (0.97, 1.13)	0.238
	MR Egger	1.05 (0.93, 1.18)	0.454
TRAIL	IVW	1.00 (0.95, 1.05)	0.887
	Weighted Median	1.01 (0.94, 1.08)	0.876
	MR Egger	0.98 (0.91, 1.04)	0.496
VEGF	IVW	1.02 (0.97, 1.07)	0.467
	Weighted Median	0.99 (0.93, 1.05)	0.798
	MR Egger	1.01 (0.92, 1.10)	0.849
a. P<0.05, b.Surpass the Bonferroni-corrected p-value threshold

## Sheet: Tab S7
Supplementary Table S7: The effect estimates and 95% CI for MR associations between circulation levels of cytokines and stillbirths (SBs)
Exposure	Method	Beta (95% C.I.)	P-value
IL-1b	IVW	0.001 (-0.015, 0.017)	0.903
	Weighted Median	-0.003 (-0.021, 0.015)	0.742
	MR Egger	0.023 (-0.013, 0.059)	0.269
IL1ra	IVW	0.000 (-0.009, 0.008)	0.947
	Weighted Median	-0.001 (-0.013, 0.010)	0.848
	MR Egger	-0.019 (-0.042, 0.004)	0.131
IL-2	IVW	-0.004 (-0.011, 0.003)	0.301
	Weighted Median	-0.005 (-0.016, 0.005)	0.294
	MR Egger	-0.018 (-0.031, -0.005)	0.015
IL2ra	IVW	0.001 (-0.004, 0.007)	0.649
	Weighted Median	0.000 (-0.008, 0.008)	0.969
	MR Egger	0.001 (-0.008, 0.010)	0.847
IL-4	IVW	0.000 (-0.011, 0.011)	0.997
	Weighted Median	-0.007 (-0.022, 0.007)	0.333
	MR Egger	-0.008 (-0.027, 0.010)	0.382
IL-5	IVW	-0.005 (-0.013, 0.003)	0.199
	Weighted Median	-0.007 (-0.018, 0.003)	0.165
	MR Egger	-0.012 (-0.029, 0.005)	0.196
IL-6	IVW	0.005 (-0.007, 0.017)	0.410
	Weighted Median	0.007 (-0.010, 0.024)	0.401
	MR Egger	0.015 (-0.009, 0.039)	0.246
IL-7	IVW	0.000 (-0.007, 0.006)	0.956
	Weighted Median	-0.002 (-0.010, 0.007)	0.695
	MR Egger	-0.002 (-0.016, 0.011)	0.765
IL-8	IVW	-0.002 (-0.010, 0.006)	0.630
	Weighted Median	0.002 (-0.007, 0.012)	0.618
	MR Egger	0.006 (-0.007, 0.019)	0.398
IL-9	IVW	0.001 (-0.007, 0.008)	0.865
	Weighted Median	-0.001 (-0.011, 0.009)	0.876
	MR Egger	-0.002 (-0.018, 0.015)	0.851
IL-10	IVW	-0.002 (-0.010, 0.006)	0.645
	Weighted Median	-0.003 (-0.013, 0.008)	0.615
	MR Egger	-0.003 (-0.020, 0.015)	0.765
IL-12p70	IVW	-0.004 (-0.011, 0.003)	0.252
	Weighted Median	-0.002 (-0.010, 0.007)	0.665
	MR Egger	0.003 (-0.009, 0.014)	0.645
IL-13	IVW	-0.002 (-0.007, 0.003)	0.490
	Weighted Median	-0.003 (-0.010, 0.004)	0.432
	MR Egger	-0.005 (-0.015, 0.004)	0.305
IL-16	IVW	0.001 (-0.005, 0.007)	0.772
	Weighted Median	0.002 (-0.005, 0.009)	0.588
	MR Egger	0.005 (-0.004, 0.014)	0.309
IL-17	IVW	-0.002 (-0.012, 0.007)	0.625
	Weighted Median	0.001 (-0.012, 0.014)	0.913
	MR Egger	-0.003 (-0.024, 0.018)	0.781
IL-18	IVW	-0.004 (-0.010, 0.002)	0.218
	Weighted Median	-0.002 (-0.009, 0.006)	0.647
	MR Egger	0.002 (-0.011, 0.014)	0.805
bNGF	IVW	-0.007 (-0.015, 0.001)	0.110
	Weighted Median	-0.009 (-0.020, 0.002)	0.102
	MR Egger	0.004 (-0.030, 0.038)	0.808
CTACK	IVW	-0.008 (-0.014, -0.001)	0.025a
	Weighted Median	-0.007 (-0.015, 0.001)	0.102
	MR Egger	-0.015 (-0.027, -0.003)	0.028a
Eotaxin	IVW	0.000 (-0.008, 0.009)	0.906
	Weighted Median	0.005 (-0.006, 0.015)	0.374
	MR Egger	0.002 (-0.017, 0.022)	0.818
FGFBasic	IVW	-0.004 (-0.017, 0.008)	0.506
	Weighted Median	-0.011 (-0.028, 0.007)	0.242
	MR Egger	-0.031 (-0.070, 0.008)	0.144
GCSF	IVW	0.001 (-0.011, 0.012)	0.910
	Weighted Median	0.003 (-0.011, 0.018)	0.651
	MR Egger	0.001 (-0.018, 0.021)	0.900
GROa	IVW	0.002 (-0.003, 0.007)	0.362
	Weighted Median	0.004 (-0.003, 0.010)	0.276
	MR Egger	0.004 (-0.006, 0.014)	0.463
HGF	IVW	-0.003 (-0.017, 0.011)	0.638
	Weighted Median	-0.004 (-0.020, 0.011)	0.596
	MR Egger	-0.004 (-0.036, 0.029)	0.836
IFNg	IVW	-0.006 (-0.018, 0.006)	0.340
	Weighted Median	0.000 (-0.017, 0.017)	0.980
	MR Egger	0.002 (-0.022, 0.025)	0.902
IP10	IVW	-0.003 (-0.010, 0.004)	0.393
	Weighted Median	-0.002 (-0.013, 0.008)	0.649
	MR Egger	0.011 (-0.004, 0.025)	0.185
MCP1	IVW	-0.002 (-0.009, 0.005)	0.585
	Weighted Median	-0.003 (-0.014, 0.008)	0.548
	MR Egger	-0.011 (-0.025, 0.003)	0.139
MCP3	IVW	0.000 (-0.005, 0.005)	0.907
	Weighted Median	0.001 (-0.006, 0.007)	0.843
	MR Egger	-0.004 (-0.016, 0.008)	0.519
MCSF	IVW	0.001 (-0.004, 0.007)	0.668
	Weighted Median	0.000 (-0.007, 0.007)	0.973
	MR Egger	0.002 (-0.008, 0.012)	0.665
MIF	IVW	0.004 (-0.003, 0.011)	0.236
	Weighted Median	0.003 (-0.006, 0.013)	0.475
	MR Egger	0.002 (-0.010, 0.013)	0.795
MIG	IVW	-0.006 (-0.013, 0.002)	0.166
	Weighted Median	-0.009 (-0.018, 0.000)	0.049
	MR Egger	-0.011 (-0.025, 0.003)	0.149
MIP1a	IVW	0.002 (-0.005, 0.009)	0.565
	Weighted Median	0.002 (-0.008, 0.012)	0.701
	MR Egger	0.003 (-0.011, 0.017)	0.677
MIP1b	IVW	-0.002 (-0.009, 0.004)	0.502
	Weighted Median	-0.001 (-0.009, 0.007)	0.791
	MR Egger	0.000 (-0.009, 0.010)	0.941
PDGFbb	IVW	-0.001 (-0.008, 0.007)	0.838
	Weighted Median	0.003 (-0.007, 0.014)	0.545
	MR Egger	0.001 (-0.014, 0.015)	0.919
RANTES	IVW	0.002 (-0.008, 0.013)	0.678
	Weighted Median	0.008 (-0.003, 0.020)	0.163
	MR Egger	0.023 (0.000, 0.046)	0.078
SCF	IVW	-0.014 (-0.024, -0.005)	0.004a
	Weighted Median	-0.015 (-0.028, -0.001)	0.030a
	MR Egger	-0.012 (-0.034, 0.010)	0.296
SCGFb	IVW	-0.001 (-0.006, 0.005)	0.842
	Weighted Median	0.001 (-0.006, 0.009)	0.751
	MR Egger	-0.008 (-0.018, 0.001)	0.103
SDF1a	IVW	-0.014 (-0.024, -0.003)	0.012a
	Weighted Median	-0.014 (-0.029, 0.001)	0.060
	MR Egger	-0.023 (-0.045, -0.001)	0.058
TNFa	IVW	-0.005 (-0.013, 0.003)	0.215
	Weighted Median	-0.001 (-0.012, 0.010)	0.867
	MR Egger	0.002 (-0.012, 0.016)	0.838
TNFb	IVW	0.000 (-0.005, 0.005)	0.972
	Weighted Median	0.001 (-0.005, 0.008)	0.686
	MR Egger	0.001 (-0.007, 0.009)	0.851
TRAIL	IVW	0.000 (-0.005, 0.005)	0.942
	Weighted Median	0.000 (-0.007, 0.007)	0.931
	MR Egger	0.002 (-0.005, 0.008)	0.620
VEGF	IVW	0.000 (-0.006, 0.005)	0.870
	Weighted Median	-0.001 (-0.008, 0.005)	0.690
	MR Egger	0.000 (-0.009, 0.009)	0.998
a. P<0.05, b.Surpass the Bonferroni-corrected p-value threshold

## Sheet: Tab S8
Supplementary Table S8: The effect estimates and 95% CI for MVMR associations of circulation levels of cytokines with BW and SB
Outcome	Exposure	IVW Beta (95% C.I.)	P-value
Birthweight	SDF1a	-0.031 (-0.072, 0.009)	0.136
	MIP1b	-0.027 (-0.046, -0.007)	0.009a,b
	MCSF	-0.024 (-0.045, -0.003)	0.029a
Stillbirth	CTACK	-0.006 (-0.012, 0.000)	0.062
	SDF1a	-0.010 (-0.021, 0.002)	0.104
	SCF	-0.014 (-0.024, -0.004)	0.012a,b
a. P<0.05, b.Surpass the Bonferroni-corrected p-value threshold

## Sheet: Tab S9
Supplementary Table S9: ORs (95% CIs) for MVMR associations of circulation levels of cytokines with SM
Outcome	Exposure	IVW Odds Ratio (95% C.I.)	P-value
Spontaneous Miscarriages	MCP3	1.03 (0.99, 1.07)	0.197
	MCP1	0.90 (0.83, 0.97)	0.007a,b
	IL-17	1.10 (0.97, 1.24)	0.161
	IL-1b	1.05 (0.93, 1.20)	0.433
a. P<0.05, b.Surpass the Bonferroni-corrected p-value threshold

## Sheet: Tab S10
Supplementary Table S10: The effect estimates and 95% CI for MVMR associations of circulation levels of cytokines (included potential cytokines) with BW
Outcome	Exposure	IVW Beta (95% C.I.)	P-value
Birthweight	MIF	-0.030 (-0.055, -0.005)	0.023a
	SDF1a	-0.042 (-0.082, -0.003)	0.039a
	MIP1b	-0.026 (-0.045, -0.008)	0.007a,b
	MCSF	-0.024 (-0.045, -0.003)	0.030a
	IP10	0.047 (0.022, 0.071)	0.000a,b
a. P<0.05, b.Surpass the Bonferroni-corrected p-value threshold

[truncated: 5 more sheets: Tab S11, Tab S12, Tab S13, Tab S14, Tab S15]
